# Supplementary material
Source: PubMed Central journal article supplement (PMC4076112)

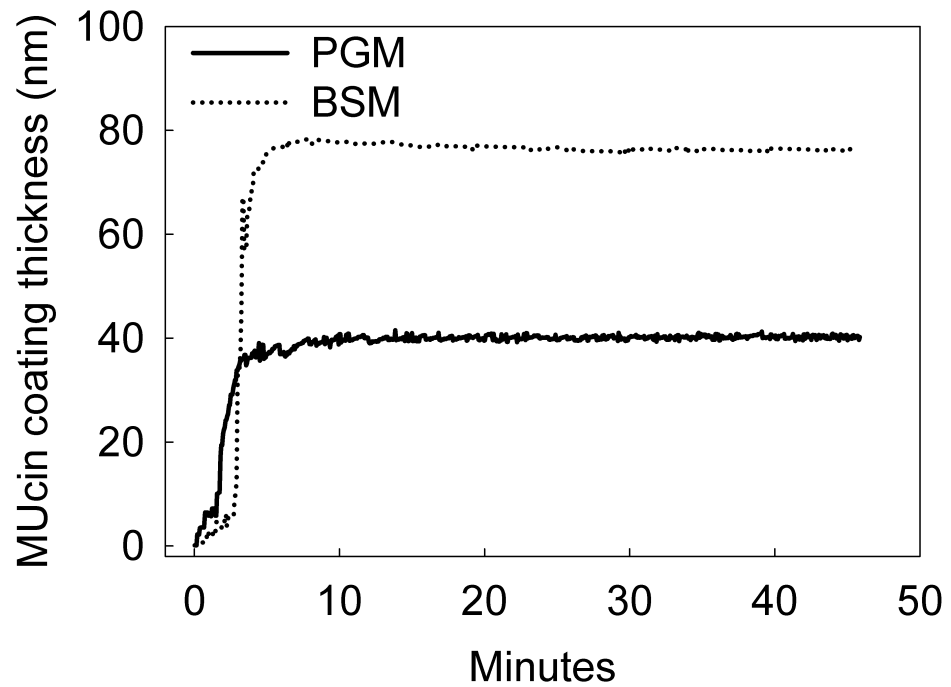

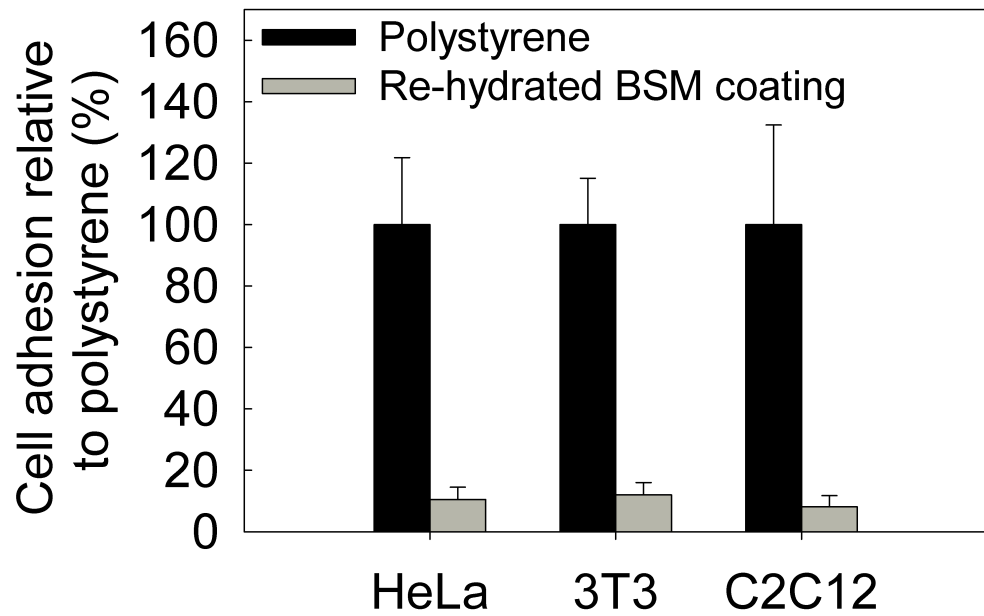

Supplement: NIHMS587295-supplement-Supplemental_Information_1___2.pdf [file NIHMS587295-supplement-Supplemental_Information_1___2.pdf]
